# Supplementary material for: Acquisition of the Cardinal Principle Coincides with Improvement in Approximate Number System Acuity in Preschoolers
Source: PLoS One. 2016 Apr 14;11(4):e0153072. doi: 10.1371/journal.pone.0153072 (PMC4831828; doi:10.1371/journal.pone.0153072)
Supplement: S1 DataSet — (XLSX) [file pone.0153072.s001.xlsx]

## Sheet: Who Has More
ID	Sex		S1 Age	S1 Anti	S1 Cor	S1 Total	S1 W		S2 Age	S2 Anti	S2 Cor	S2 Total	S2 W		S3 Age	S3 Anti	S3 Cor	S3 Total	S3 W		S4 Age	S4 Anti	S4 Cor	S4 Total	S4 W		S5 Age	S5 Anti	S5 Cor	S5 Total	S5 W		S6 Age	S6 Anti	S6 Cor	S6 Total	S6 W
1	M		42	48.2759	64.5161	56.6667	1.15492		43	42.8571	68.75	56.6667	2.63414		44	53.3333	66.6667	60	1.05626		45	70	60	65	0.581023		46	41.1765	50	44.4444	DNF						DNF
2	F		42	61.5385	52.9412	56.6667	1.54791
3	F		39	63.3333	70	66.6667	0.652431		40	60	66.6667	63.3333	0.844586
4	F		42	53.3333	60	56.6667	DNF		43	50	60	55	DNF		44	43.3333	60	51.6667	2.33146		45	58.3333	50	53.3333	2.26251		46	65.2174	59.4595	61.6667	0.723253		47	56.6667	43.3333	50	2.72641
5	M		45	64	71.4286	68.3333	0.559394		46						47	80	73.3333	76.6667	0.286433		48	73.3333	70	71.6667	0.411821		49	90	73.3333	81.6667	0.251464		50	66.6667	80	74.0741	DNF
6	M		36	58.6207	41.9355	50	2.45974		37	35.7143	60	45.8333	DNF		38	80	73.3333	76.6667	0.43042		39	66.6667	72.2222	70	0.433896		40	56	77.1429	68.3333	0.629591		41	65.5172	45.1613	55	1.71811
7	F		36	56.25	70	63.8889	DNF
8	M		56	63.3333	50	56.6667	1.52398
9	M		50	75.8621	67.7419	71.6667	0.435582		51	56.6667	56.6667	56.6667	1.45606														54	60	63.3333	61.6667	0.787872		55	52.381	64.1026	60	1.11302
10	F		51	46.1538	58.3333	52	DNF
11	F		52	41.3793	58.0645	50	DNF		53	62.069	67.7419	65	0.468873		54	68	85.7143	78.3333	0.34242		55	71.4286	87.5	80	0.326378		56	71.4286	75	73.3333	0.418195		57	83.3333	63.3333	73.3333	0.349475
12	M		37	43.3333	53.3333	48.3333	DNF		38	60	53.3333	56.6667	1.03912														41	63.3333	43.3333	53.3333	1.42001		42	60	50	55	2.23571
13	M		50	73.3333	60	66.6667	0.508413		51	63.3333	90	76.6667	0.352746		52	78.5714	84.375	81.6667	0.244211		53	86.6667	80	83.3333	0.183546		54	62.069	67.7419	65	0.558188			76	74.2857	75	0.33101
14	F		50	66.6667	66.6667	66.6667	0.824513		51	60	76.6667	68.3333	0.415944		52	90	76.6667	83.3333	0.198798		53	100	74.1935	86.6667	0.214781		54	96	85.7143	90	0.149851		55	90	70	80	0.269882
15	F		60	93.3333	83.3333	88.3333	0.132992		61						62
16	M		36	48	40	43.3333	DNF		37	50	41.1765	45	DNF		38	66.6667	50	58.3333	1.21047		39	56.6667	66.6667	61.6667	1.23624		40	47.0588	40	43.75	DNF		41	62.963	45.4545	53.3333	2.27442
17	M		58	90	83.3333	86.6667	0.182728		59						60
18	F		51	72.4138	77.4194	75	0.309986		52	64.2857	56.25	60	0.675		53	80	66.6667	73.3333	0.410477		54	75	90.625	83.3333	0.232279		55	70	66.6667	68.3333	0.559394		56	73.3333	73.3333	73.3333	0.373946
19	M		54	80	90	85	0.165348		55						56																		59	76.6667	76.6667	76.6667	0.354017
20	M		49	75	71.875	73.3333	0.444866		50	70	80	75	0.338925		51	74.0741	78.7879	76.6667	0.326321		52	65.5172	93.5484	80	0.278394		53	76.6667	80	78.3333	0.261536		54	96.6667	83.3333	90	0.0985644
21	M		51	63.3333	73.3333	68.3333	0.434693		52	53.3333	40	46.6667	DNF		53	60	63.3333	61.6667	1.18068		54	53.3333	66.6667	60	1.40767		55	66.6667	54.5455	60	1.2779		56	60.7143	53.125	56.6667	1.56525
22	F		47	83.3333	90	86.6667	0.146569		48	80	76.6667	78.3333	0.302204		49	80	83.3333	81.6667	0.201228		50	70	66.6667	68.3333	0.436744		51	89.2857	75	81.6667	0.211124		52	80	97.1429	90	0.101136
23	F		39	47.8261	72.973	63.3333	1.37417		40	63.3333	73.3333	68.3333	0.568513		41	61.5385	73.5294	68.3333	0.434277		42	84.6154	79.4118	81.6667	0.201347		43	93.3333	66.6667	80	0.278394		44	66.6667	77.7778	73.3333	0.40016
24	F		38	50	60	55	2.46805		39	80	63.3333	71.6667	0.41105		40	80	76.6667	78.3333	0.343589		41	78.5714	81.25	80	0.279547		42	80	66.6667	73.3333	0.331252		43	73.0769	67.6471	70	0.40406
25	F		43	51.8519	45.4545	48.3333	DNF																										48	50	50	50	DNF
26	F		43	60	36.6667	48.3333	DNF		44	42.8571	50	46.6667	DNF		45	50	80	65	0.566978		46	60.7143	75	68.3333	0.576472		47	64	74.2857	70	0.489794		48	43.3333	60	51.6667	DNF
27	M		46	62.5	42.8571	53.3333	DNF																										51	82.1429	75	78.3333	0.305027
28	M		43	60	66.6667	63.3333	0.625384		44	60.7143	75	68.3333	0.485839		45	76	65.7143	70	0.499408		46	46.6667	46.6667	46.6667	DNF		47	74.0741	66.6667	70	0.871989		48	73.3333	86.6667	80	0.277468
29	F		52	60.8696	64.8649	63.3333	0.739431		53	73.913	83.7838	80	0.245564		54	61.5385	76.4706	70	0.39027		55	62.963	78.7879	71.6667	0.382044		56	53.8462	73.5294	65	0.54672		57	83.3333	86.6667	85	0.214496
30	F		42	43.3333	36.6667	40	DNF																										47	56.6667	60	58.3333	1.21416
31	F		49	76.6667	76.6667	76.6667	0.294551		50	71.4286	84.6154	80	0.252523		51	96.4286	75	85	0.152735		52	88.4615	79.4118	83.3333	0.237391		53	75	75	75	0.34493		54	66.6667	50	60	DNF
32	F		49	60	80	70	0.456856		50	70	66.6667	68.3333	0.477498		51	60	70	65	0.5627		52	63.3333	66.6667	65	0.631585		53	51.8519	66.6667	60	0.792387		54	72	71.4286	71.6667	0.435582
33	M		42	83.3333	66.6667	75	0.342176		43	67.8571	81.25	75	0.335678		44	69.2308	70.5882	70	0.368328		45	75.8621	80.6452	78.3333	0.306748		46	63.3333	40	51.6667	DNF		47	63.3333	63.3333	63.3333	1.20927
34	F		44	44.4444	60.6061	53.3333	2.06403		45	81.4815	69.697	75	0.372156		46	67.8571	81.25	75	0.313011		47	86.6667	73.3333	80	0.314927		48	64.2857	78.125	71.6667	0.404133		49	56.6667	36.6667	46.6667	DNF
35	F		50	46.6667	66.6667	56.6667	1.31038		51	64.2857	78.125	71.6667	0.436742		52	42.8571	75	60	0.817341		53	36.6667	86.6667	61.6667	1.23624		54	40	63.3333	51.6667	DNF		55	43.3333	60	51.6667	DNF
36	M		52	60.7143	78.125	70	0.513917		53	60.7143	65.625	63.3333	0.926928		54	58.6207	70.9677	65	0.587273		55	83.3333	60	71.6667	0.376314		56	62.5	61.1111	61.6667	0.581096		57	31.0345	80.6452	56.6667	1.84036
37	F		54	73.3333	80	76.6667	0.270165																										59	85.1852	81.8182	83.3333	0.183546
38	F		51	60	66.6667	63.3333	0.692427		52	80	86.6667	83.3333	0.211154		53	73.3333	83.3333	78.3333	0.315755		54	83.3333	86.6667	85	0.212649		55	78.2609	100	91.6667	0.168352		56	76.6667	93.3333	85	0.195228
39	F		51	58.6207	87.0968	73.3333	0.353722		52	80	70	75	0.347437		53	83.3333	86.1111	85	0.207048		54	92.8571	96.875	95	0.0554606		55	83.3333	83.3333	83.3333	0.183546		56	60	83.3333	71.6667	0.397215
40	M		39	42.3077	52.9412	48.3333	DNF		40	42.8571	72.2222	64	DNF		41						42	44.4444	51.5152	48.3333	DNF		43	53.5714	59.375	56.6667	1.61482		44	33.3333	50	41.6667	DNF
41	F		46	76.6667	86.6667	81.6667	0.163276		47	86.6667	76.6667	81.6667	0.211124		48	73.3333	86.6667	80	0.261069		49	80.7692	91.1765	86.6667	0.159881		50	78.5714	90.625	85	0.140985		51	86.6667	90	88.3333	0.157961
42	M		46	86.9565	89.1892	88.3333	0.176802		47	81.4815	96.9697	90	0.158841		48	86.6667	93.3333	90	0.101136		49	95.8333	86.1111	90	0.180561		50	96.4286	90.625	93.3333	0.133323		51	86.6667	76.6667	81.6667	0.229867
43	F		50	73.3333	76.6667	75	0.361371		51	86.2069	77.4194	81.6667	0.252951		52	76.6667	83.3333	80	0.222183		53	80	93.3333	86.6667	0.215115		54	89.2857	90.625	90	0.129558		55	83.3333	90	86.6667	0.174538
44	M		55	53.8462	52.9412	53.3333	DNF		56	58.6207	58.0645	58.3333	1.23341		57	53.3333	63.3333	58.3333	0.790043		58	82.7586	67.7419	75	0.3549		59	33.3333	44.4444	38.0952	DNF
45	F		45	88	80	83.3333	0.190632		46	66.6667	80	73.3333	0.333074		47	73.3333	83.3333	78.3333	0.29854		48	76.6667	90	83.3333	0.169565		49	86.3636	92.1053	90	0.184917		50	90	90	90	0.149851
46	M		51	69.2308	94.1176	83.3333	0.190632		52	66.6667	81.8182	75	0.31785		53	66.6667	80	73.3333	0.333074		54	86.6667	86.6667	86.6667	0.199535		55	70	86.6667	78.3333	0.25189		56	83.3333	86.6667	85	0.201819

## Sheet: GiveN and Fast Cards
ID	Sex		S1 Age	S1 KN	S1 T1A	S1 T1B	S1 T1C	S1 T1D	S1 T2A	S1 T2B	S1 T2C	S1 T2D	S1 T3A	S1 T3B	S1 T3C	S1 T3D	S1 T4A	S1 T4B	S1 T4C	S1 T4D	S1 T6A	S1 T6B	S1 T6C	S1 T6D	S1 T10A	S1 T10B	S1 T10C	S1 T10D	S1 T14A	S1 T14B	S1 T14C	S1 T14D	S1 Map		S2 Age	S2 KN	S2 T1A	S2 T1B	S2 T1C	S2 T1D	S2 T2A	S2 T2B	S2 T2C	S2 T2D	S2 T3A	S2 T3B	S2 T3C	S2 T3D	S2 T4A
1	M		42	4	1	1	1	1	2	2	2	2	3	11	5	3	11	5	3	4	6	8	10	11	10	10	8	8	5	9	10	5	0		43	4	1	1	1	1	2	2	2	2	3	4	3	3	9
2			42	4
3	F		39	3	1	1	1	1	2	2	2	2	3	5	2	3	5	5	5	2	4	5	3	2	5	5	4	5	5	5	5	5	0		40	4	1	1	1	1	2	2	2	2	3	3	2	3	3
4	F		42	3																															43	3
5	M		45	6	1	1	1	1	2	2	2	2	3	3	3	3	3	3	3	3	5	6	10	3	10	6	9	6	10	6	7	6	0		46	6	1	1	1	1	2	2	2	2	3	3	3	3	3
6	M		36	1																															37	1
7			36
8	M		56	6	1	1	1	1	2	2	2	2	3	3	3	3	3	3	3	4	5	4	5	4	8	5	8	8	7	14	17	7	1
9	M		50	2	1	1	1	1	2	2	2	2	3	3	3	3	3	2	10	10	3	10	5	3	5	3	3	3	5	10	4	20	0		51	2	1	1	1	1	2	2	2	2	5	5	5	14	5
10			51
11	F		52	4	1	1	1	1	2	2	2	2	4	2	2	2	3	2	4	3	4	6	8	3	6	7	9	7	6	7	10	7	0		53	6	1	1	1	1	2	2	2	2	2	3	2	2	9
12	M		37	1	1	1	1	1	3	5	4	5	3	4	2	6	6	5	2	3	4	4	7	3	5	5	4	2	4	4	5	5	0		38	1	1	1	1	1	2	4	3	3	2	3	2	3	5
13	M		50	6	1	1	1	1	2	2	2	2	3	3	3	3	6	4	4	5	4	4	3	4	5	5	4	4	4	4	5	5	0		51	6	1	1	1	1	2	2	2	2	3	3	3	3	5
14	F		50	6																															51	6	1	1	1	1	2	2	2	2	3	3	3	3	3
15	F		60	6	1	1	1	1	2	2	2	2	3	3	3	3	4	4	4	4	5	6	6	3	20	9	8	9	15	10	10	9	1		61	6
16	M		36	1																															37	1	1	1	1	1	2	2	4	5	2	2	2	3	5
17	M		58	6	1	1	1	1	2	2	2	2	3	3	3	3	4	4	4	4	6	5	5	5	11	11	5	8	15	15	9	16	1		59	6
18	F		51	6	1	1	1	1	2	2	2	3	3	3	3	3	3	4	3	3	10	4	4	4	20	5	20	20	20	20	20	20	1		52	6	1	1	1	1	2	2	2	2	3	3	3	3	8
19	M		54	2	1	1	1	1	2	2	2	2	3	2	2	3	3	3	3	4	3	5	5	11	4	7	6	5	5	3	4	11	0		55	2
20	M		49	3																															50	3	1	1	1	1	2	4	2	3	6	3	2	4	3
21	M		51	3	1	1	1	1	2	2	2	2	4	3	3	3	4	3	4	3	5	4	4	5	5	5	5	5	5	5	5	5	0		52	3	1	1	1	1	2	2	2	2	3	3	3	4	14
22	F		47	6	1	1	1	1	2	2	2	2	3	3	3	3	4	4	4	4	6	5	5	8	10	6	6	5	10	10	10	10	1		48	6	1	1	1	1	2	2	2	2	3	3	3	3	4
23	F		39	3	1	1	1	1	2	2	2	2	3	3	3	3	5	3	3	3	3	3	5	3	5	3	5	5	5	5	5	5	0		40	3	1	1	1	1	2	2	2	2	3	3	3	3	6
24	F		38	4	1	1	1	1	2	2	2	2	3	3	3	3	3	3	3	3	3	7	5	10	7	8	8	10	7	10	3	7	0		39	4	1	1	1	1	2	2	2	2	3	3	3	3	4
25	F		43	1	1	1	1	1	2	3	3	3	4	8	4	4	7	8	4	3	5	5	5	5	5	5	5	5	5	5	5	5	0
26	F		43	3	1	1	1	1	2	2	2	2	4	7	3	4	5	6	2	5	3	4	5	3	4	5	5	6	5	5	3	3	0		44	4	1	1	1	1	2	2	2	2	3	3	7		3
27	M		46	2	1	1	1	1	2	2	2	2	3	3	3	3	3	2	3	15	4	3	3	3	3	3	3	15	3	14	14	3	0
28	M		43	2	1	1	1	1	2	2	2	2	2	5	4	3	5	5	5	2	5	10	5	4	5	5	5	5	6	5	5	5	0		44	2	1	1	1	1	2	2	2	2	3	3	3	3	4
29	F		52	6	1	1	1	1	2	2	2	2	3	3	3	3	3	3	3	4	7	4	3	3	7	5	4	6	15	17	17	6	1		53	6	1	1	1	1	2	2	2	2	3	3	3	3	4
30	F		42	2	1	1	1	1	2	2	2	2	3	3	4	6	6	3	4	4	8	6	6	3	5	5	5	5	5	5	5	5	0
31	F		49	6	1	1	1	1	2	2	2	2	3	3	3	3	6	5	3	4	10	5	4	12	7	10	11	7	20	11	10	6	0		50	6	1	1	1	1	2	2	2	2	3	3	3	3	5
32	F		49	6	1	1	1	1	2	2	2	2	3	3	8	4	8	5	3	3	3	3	4	3	7	4	3	5	5	5	4	3	0		50	6	1	1	1	1	2	2	2	2	4	3	3	3	7
33	M		42	6	1	1	1	1	2	2	2	2	3	3	4	2	3	3	10	3	4	3	3	3	5	4	4	5	10	10	4	5	1		43	6	1	1	1	1	2	2	2	2	3	3	3	3	4
34	F		44	3	1	1	1	1	2	3	2	2	3	3	3	3	3	4	4	4	4	3	9	3	4	4	4	5	5	5	5	4	0		45	3	1	1	1	1	2	2	2	2	2	3	6	3	3
35	F		50	2	1	1	1	1	2	2	2	2	3	4	4	4	6	4	9	4	3	5	16	16	5	6	5	3	5	5	5	5	0		51	2	1	1			2	2	11		17	3			13
36	M		52	6	1	1	1	1	2	2	2	2	3	4	3	3	6	3	3	3	3	3	5	5	5	4	6	4	4	5	4	4	0		53	6	1	1	1	1	2	2	2	2	3	3	3	3	3
37	F		54	6	1	1	1	1	2	2	2	2	3	3	3	3	3	4	8	4	4	4	4	10	7	6	5	5	8	10	8	6	0
38	F		51	6	1	1	1	1	2	2	2	2	3	3	3	3	4	4	4	4	4	5	6	4	6	6	9	6	10	10	6	5	0		52	6	1	1	1	1	2	2	2	2	3	3	3	3	4
39	F		51	6	1	1	1	1	2	2	2	2	3	3	3	3	3	3	3	3	4	3	3	3	6	3	5	5	6	4	4	4	0		52	6	1	1	1	1	2	2	2	2	3	3	3	3	8
40	M		39	1	1	1	1	1	2	2	2	2	3	4	2	3	3	2	3	3	3	3		3	3	2	2	3	3	3	11	3	0		40	1	1	1	1	1	2	2	2	2	3	4	2	3	3
41	F		46	6	1	1	1	1	2	2	2	2	3	3	3	3	4	4	4	4	8	8	8	8	8	9	5	5	10	6	7	4	0		47	6	1	1	1	1	2	2	2	2	3	3	3	3	4
42	M		46	6	1	1	1	1	2	2	2	2	3	3	3	3	4	4	4	4	5	5	6	5	12	6	10	5	8	12	5	14	0		47	6	1	1	1	1	2	2	2	2	3	3	3	3	4
43	F		50	6	1	1	1	1	2	2	2	2	3	3	3	3	4	4	3	4	5	4	5	5	10	10	10	6	10	10	10	10	1		51	6	1	1	1	1	2	2	2	2	3	3	3	3	4
44	M		55	5																															56	6	1	1	1	1	2	2	2	2	3	3	3	3	3
45	F		45	6	1	1	1	1	2	2	2	2	3	3	3	3	4	4	3	4	5	5	5	5	11	5	5	8	10	12	7	9	1		46	6	1	1	1	1	2	2	2	2	3	3	3	3	4
46	M		51	6	1	1	1	1	2	2	2	2	3	3	3	3	4	3	3	3	8	3	8	3	10	5	10	10	10	10	10	10	1		52	6	1	1	1	1	2	2	2	2	3	3	3	3	4
[truncated: 140 more columns]

## Sheet: KEY
Column Heading	Description	Assessed by…	Coding (if applicable)
ID	Participant ID Number	Randomly Assigned
Sex	Participant Sex	Parent Report	M=male; F=female
Who Has More
S(1-6) Age	Session (1-6) Age	Parent Report (Test Date - DOB)
S(1-6) Anti	Session (1-6) Percent Correct on Area Anti-Correlated Trials	Who Has More? Task
S(1-6) Cor	Session (1-6) Percent Correct on Area Correlated Trials	Who Has More? Task
S(1-6) Total	Session (1-6) Percent Correct on All Trials	Who Has More? Task
S(1-6) W	Session (1-6) w-Score	Who Has More? Task	DNF=function does not fit data
GiveN and Fast Cards
S(1-6) KN	Session (1-6) Knower-Level	Give-N	1=one knower; 2=two knower; 3=three knower; 4=four knower; 5=five knower; 6=CP Knower
S (1-6) T1 (A-D)	Session (1-6) Trial (A-D) 1 Item	Fast Cards
S (1-6) T2 (A-D)	Session (1-6) Trial (A-D) 2 Items	Fast Cards
S (1-6) T3 (A-D)	Session (1-6) Trial (A-D) 3 Items	Fast Cards
S (1-6) T4 (A-D)	Session (1-6) Trial (A-D) 4 Items	Fast Cards
S (1-6) T6 (A-D)	Session (1-6) Trial (A-D) 6 Items	Fast Cards
S (1-6) T10 (A-D)	Session (1-6) Trial (A-D) 10 Items	Fast Cards
S (1-6) T14 (A-D)	Session (1-6) Trial (A-D) 14 Items	Fast Cards
S (1-6) MAP	Session (1-6) CP-Mapper Status	Fast Cards	1=mapper; 0=non-mapper
blank cells = missing data/not assessed
